# Supplementary material for: The significance of Brf1 overexpression in human hepatocellular carcinoma
Source: PubMed Central journal article supplement (PMC4868753; doi:10.18632/oncotarget.6668), 2015-12-18
Supplement: oncotarget-07-6243-s001.pdf [file oncotarget-07-6243-s001.pdf]

## SUPPLEMENTARY TABLES AND FIGURES

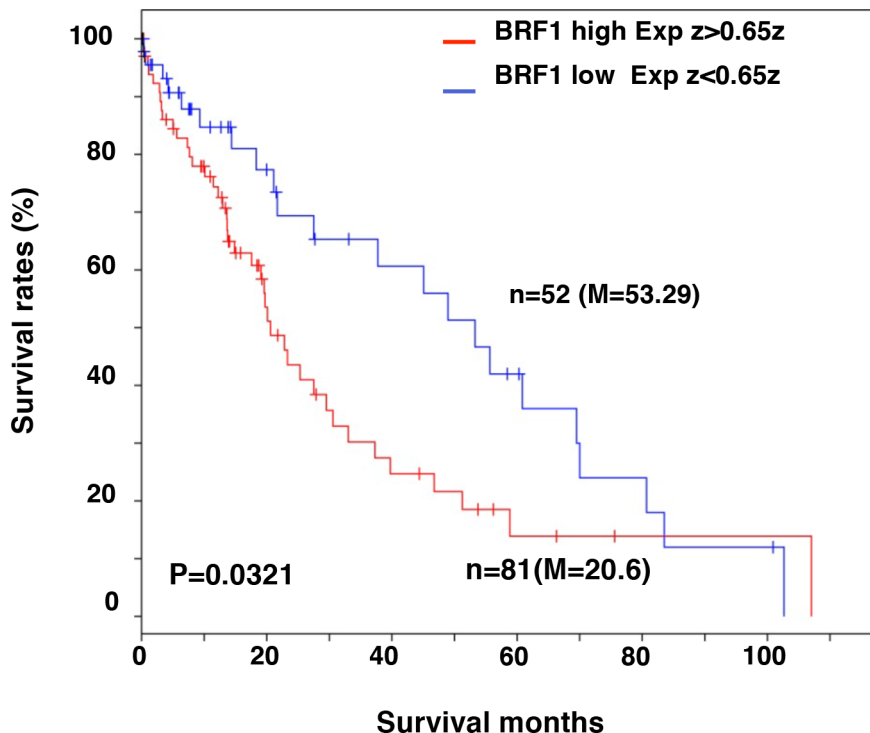

**Supplementary Figure S1: Kaplan–Meier plot of Overall Survival for 133 Liver Hepatocellular Carcinoma from publicly available TCGA data at cBioPortal stratified by level of BRF1 expression.** The Brf1 expression level z-score cut-off used for dividing the cases with high expression of Brf1 from the cases with low expression of Brf1. n = number of patients in the subgroup, M = median survival in months of the subgroup.

**Supplementary Table S1: Characteristics of 133 HCC patients**

| Characteristics       | HCC patients(N = 133) |
|-----------------------|-----------------------|
| Sex                   |                       |
| Female                | 21                    |
| Male                  | 112                   |
| Age(years)            |                       |
| $\leq 50$             | 62                    |
| $> 50$                | 71                    |
| Follow-up time(month) |                       |
| Median(range)         | 12(75)                |
| Tumor size stage      |                       |
| T1+T2                 | 86                    |
| T3a+T3b               | 46                    |
| Clinical stage        |                       |
| I+II                  | 86                    |
| III+IV                | 46                    |

**Supplementary Table S2: Association between BRF1 expression and clinicopathologic characteristics of patients with HCC (n = 133)**

| Clinical features | Number | BRF1 (-) | BRF1 (+) | P-value |
|-------------------|--------|----------|----------|---------|
| Gender            |        |          |          | 0.279   |
| Female            | 21     | 3        | 18       |         |
| Male              | 112    | 32       | 80       |         |
| Age (yrs)         |        |          |          | 0.63    |
| < 50              | 62     | 15       | 47       |         |
| > 50              | 71     | 20       | 51       |         |
| HbsAg             |        |          |          | 0.187   |
| Negative          | 22     | 3        | 19       |         |
| Positive          | 111    | 32       | 79       |         |
| Serum AFP (ng/ml) |        |          |          | 0.028   |
| < 400             | 76     | 26       | 50       |         |
| > 400             | 56     | 9        | 47       |         |
| Serum ALT         |        |          |          | 0.559   |
| < 40              | 70     | 17       | 53       |         |
| > 40              | 62     | 18       | 44       |         |
| Tumor size (cm)   |        |          |          | 1.00    |
| < 5               | 47     | 12       | 35       |         |
| > 5               | 86     | 23       | 62       |         |
| Recurrence        |        |          |          | 0.554   |
| Absent            | 68     | 20       | 48       |         |
| Present           | 64     | 15       | 49       |         |
| TNM stage (AJCC)  |        |          |          | 0.218   |
| Early (I-II)      | 86     | 26       | 60       |         |
| Advanced(III-IV)  | 46     | 9        | 37       |         |

**Supplementary Table S3: siRNA targets**

| Targets              | Sequences                                                                                                                                                                                                                                                                                                                            |
|----------------------|--------------------------------------------------------------------------------------------------------------------------------------------------------------------------------------------------------------------------------------------------------------------------------------------------------------------------------------|
| Mismatch             | sense 5'UUC UCC GAA CGU GUC ACG Utt 3'<br>antisense 5'ACG UGA CAC GUU CGG AGA Att 3'                                                                                                                                                                                                                                                 |
| Mouse Brf1 siRNA (1) | <b>A:</b> sense 5' ACC UUG AGA UUG ACA GAU A dTdT 3';<br>antisense 5' UAU CUG UCA AUC UCA AGG UdTdT 3';<br><b>B:</b> sense 5' AAG CAC UGC CCC ACU UAU UUG dTdT 3'<br>antisense 5' CAA AUA AGU GGG GCA GUG CUU dTdT 3'<br><b>C:</b> sense: 5' AAG CAC UGC CCC ACU UAU UUG dTdT 3'<br>antisense: 5' CAA AUA AGU GGG GCA GUG CUU dTdT3' |
| Human Brf1 siRNA (2) | <b>A:</b> sense 5' GGA AGA UCU GUU GUU ACU U 3'<br>antisense 5' AAG UAA CAA CAG AUC UUC C 3'<br><b>B:</b> sense 5' CCC GUG CCU GUA UAU UCC A 3'<br>antisense 5' UGG AAU AUA CAG GCA CGG G 3'<br><b>C:</b> sense 5' GAG CAU AGC GCC AGU GCC A 3'<br>antisense 5' UGG CAC UGG CGC UAU GCU C 3'                                         |

**Supplementary Table S4: Primer Sets for Quantitative RT-PCR**

| Target                           | Primers                                                                                                                                                                      | Annealing Temperature |
|----------------------------------|------------------------------------------------------------------------------------------------------------------------------------------------------------------------------|-----------------------|
| Pre-tRNA <sup>Leu</sup> (3)      | (F) 5'-GTC AGG ATG GCC GAG TGG TCT AAG-3'<br>(R) 5'-CCA CGC CTC CAT ACG GAG AAC CAG AAG ACC C-3'                                                                             | 61°                   |
| 5S rRNA (4)                      | (F) 5' GGC CAT ACC ACC CTG AAC GC 3'<br>(R) 5' CAG CAC CCG GTA TTC CCA GG 3'                                                                                                 | 61°                   |
| Mouse Brf1 (4)<br>Human Brf1 (4) | (F) 5' GGA GCA GAG CCA ATC AAG CCA -3'<br>(R) 5' CAT CAC CAT CAC AGC CGT AAT C -3'<br>(F) 5' CCT CGG GCC TCT GCG GAG CAG -3'<br>(R) 5' TCA TCA ATG GTC AAC TGA CTG GTG G -3' | 62°<br>60°            |
| GAPDH (4)                        | (F) 5'-TCC ACC ACC CTG TTG CTG TA-3'<br>(R) 5'-ACC ACA GTC CAT GCC ATC AC-3'                                                                                                 | 61°                   |

Abbreviations: (F) = forward, (R) = reverse.

## SUPPLEMENTARY REFERENCES

1. Johnson SA and Johnson DL. Enhanced RNA polymerase III-dependent transcription is required for oncogenic transformation. *J Biol Chem.* 2008; 283:19184–19191.
2. Zhong Q, Shi G, Zhang Q, Zhang Y, Levy D, Zhong S. Role of phosphorylated histone H3 serine 10 in DEN-induced deregulation of Pol III genes and cell proliferation and transformation. *Carcinogenesis.* 2013; 34: 2460–2469.
3. Crighton, D., Woiwode, A., Zhang, C., Mandavia, N., Morton, J.P., Warnock, L.J. *et al.* p53 represses RNA polymerase III transcription by targeting TBP and inhibiting promoter occupancy by TFIIIB. *EMBO J.* 2003; 22: 2810–2820.
4. Zhong S. and Johnson DL. The JNKs differentially regulate RNA polymerase III transcription by coordinately modulating the expression of all TFIIIB subunits. *Proc Natl Acad Sci U S A.* 2009; 106:12682–12687.
